# Supplementary material for: Gut Microbiota in Chronic Kidney Disease: From Composition to Modulation towards Better Outcomes—A Systematic Review
Source: J Clin Med. 2023 Mar 1;12(5):1948. doi: 10.3390/jcm12051948 (PMC10003930; doi:10.3390/jcm12051948)
Supplement: Supplementary file 1 [file jcm-12-01948-s001.zip › Tables S2-S4. Quality assessment..pdf]

**Table S2.** Quality assessment of cross-sectional using Newcastle-Ottawa scale.

| Study             | Representative-ness of the sample | Sample size | Non-response rate | Ascertainment of the exposure (risk factor) | Comparability | Assessment of the outcome | Statistical test | Total |
|-------------------|-----------------------------------|-------------|-------------------|---------------------------------------------|---------------|---------------------------|------------------|-------|
| Barros, 2015      | *                                 | *           | NA                | *                                           | **            | *                         | *                | 7     |
| Chen, 2021        | *                                 | *           | NA                | *                                           | **            | *                         | *                | 7     |
| Du, 2021          | *                                 | *           | NA                | *                                           | **            | *                         | *                | 7     |
| Gao, 2021         | *                                 | *           | NA                | *                                           | *             | *                         | *                | 6     |
| Gryp, 2021        | *                                 | *           | NA                | *                                           | *             | *                         | *                | 6     |
| Gryp, 2020        | *                                 | *           | NA                | *                                           | *             | *                         | *                | 6     |
| Guirong, 2018     | *                                 | *           | NA                | *                                           | *             | *                         | *                | 6     |
| Hanifi, 2021      | *                                 | *           | NA                | *                                           | *             | *                         | *                | 6     |
| He, 2020          | *                                 | *           | NA                | *                                           | *             | *                         | *                | 6     |
| He, 2021          | *                                 | *           | NA                | *                                           | **            | *                         | *                | 7     |
| Hu et, 2020       | *                                 | *           | NA                | *                                           | **            | *                         | *                | 7     |
| Hu, 2022          | *                                 | *           | NA                | *                                           | **            | *                         | *                | 7     |
| Jiang, 2017       | *                                 | *           | NA                | *                                           | **            | *                         | *                | 7     |
| Khiabani, 2022    | *                                 | *           | NA                | *                                           | *             | *                         | *                | 6     |
| Kim, 2020         | *                                 | *           | NA                | *                                           | **            | *                         | *                | 7     |
| Kumar, 2021       | *                                 | *           | NA                | *                                           | **            | *                         | *                | 7     |
| Lun, 2018         | *                                 | *           | NA                | *                                           | *             | *                         | *                | 6     |
| Margiotta, 2020   | *                                 | *           | NA                | *                                           | **            | *                         | *                | 7     |
| Al-Obaide, 2017   | *                                 | *           | NA                | *                                           | *             | *                         | *                | 7     |
| Salguero, 2019    | *                                 | *           | NA                | *                                           | **            | *                         | *                | 7     |
| Sato, 2021        | *                                 | *           | NA                | *                                           | **            | *                         | *                | 7     |
| Stadlbauer, 2017  | *                                 | *           | NA                | *                                           | **            | *                         | *                | 7     |
| Wang, 2019        | *                                 | *           | NA                | *                                           | **            | *                         | *                | 7     |
| Wang et al., 2020 | *                                 | *           | NA                | *                                           | *             | *                         | *                | 6     |
| Wu, 2020          | *                                 | *           | NA                | *                                           | **            | *                         | *                | 7     |
| Wu, 2020          | *                                 | *           | NA                | *                                           | **            | *                         | *                | 7     |
| Wu, 2020          | *                                 | *           | NA                | *                                           | **            | *                         | *                | 7     |
| Wu, 2021          | *                                 | *           | NA                | *                                           | **            | *                         | *                | 7     |
| Wu, 2020          | *                                 | *           | NA                | *                                           | **            | *                         | *                | 7     |
| Xu, 2017          | *                                 | *           | NA                | *                                           | *             | *                         | *                | 6     |
| Zhang, 2021       | *                                 | *           | NA                | *                                           | *             | *                         | *                | 6     |
| Zhang, 2020       | *                                 | *           | NA                | *                                           | **            | *                         | *                | 7     |
| Zhou, 2022        | *                                 | *           | NA                | *                                           | *             | *                         | *                | 6     |
| Zhu, 2022         | *                                 | *           | NA                | *                                           | **            | *                         | *                | 7     |

NA = not applicable.

Good quality: 3 or 4 stars in selection domain AND 1 or 2 stars in comparability domain AND 2 or 3 stars in outcome/exposure domain. Fair quality: 2 stars in selection domain AND 1 or 2 stars in comparability domain AND 2 or 3 stars in outcome/exposure domain. Poor quality: 0 or 1 star in selection domain OR 0 stars in comparability domain OR 0 or 1 stars in outcome/exposure domain.

**Table S3.** Quality assessment of case-control studies using Newcastle-Ottawa scale.

| Study       | Case definition | Case representativeness | Selection of controls | Definition of controls | Comparability | Exposure ascertainment | Ascertainment methods | Non-response rate | Total |
|-------------|-----------------|-------------------------|-----------------------|------------------------|---------------|------------------------|-----------------------|-------------------|-------|
| Hu, 2020    | *               | *                       | *                     | *                      | *             | *                      | *                     |                   | 7     |
| Hu, 2020    | *               | *                       | *                     | *                      | *             | *                      | *                     |                   | 7     |
| Jiang, 2016 | *               | *                       | *                     | *                      | *             |                        | *                     |                   | 6     |
| Lin, 2020   | *               | *                       | *                     | *                      | *             | *                      | *                     |                   | 7     |
| Lin, 2020   | *               | *                       | *                     | *                      | *             | *                      | *                     |                   | 7     |
| Lin, 2022   | *               | *                       | *                     | *                      | *             | *                      | *                     |                   | 7     |
| Liu, 2021   | *               | *                       | *                     | *                      | *             | *                      | *                     |                   | 7     |

Good quality: 3 or 4 stars in selection domain AND 1 or 2 stars in comparability domain AND 2 or 3 stars in outcome/exposure domain. Fair quality: 2 stars in selection domain AND 1 or 2 stars in comparability domain AND 2 or 3 stars in outcome/exposure domain. Poor quality: 0 or 1 star in selection domain OR 0 stars in comparability domain OR 0 or 1 stars in outcome/exposure domain.

**Table S4.** Quality assessment of cohort studies using Newcastle-Ottawa scale.

| Study            | Representativeness of the exposed cohort | Selection of the non-exposed cohort | Ascertainment of exposure | Presence of outcome of interest at the start | Comparability of cohorts | Assessment of outcome | Follow-up long enough for outcomes to occur | Adequacy of follow-up | Total |
|------------------|------------------------------------------|-------------------------------------|---------------------------|----------------------------------------------|--------------------------|-----------------------|---------------------------------------------|-----------------------|-------|
| Abdelbary, 2022  | *                                        | *                                   | *                         | *                                            |                          | *                     | *                                           |                       | 6     |
| Iguchi, 2020     | *                                        | *                                   | *                         | *                                            | *                        | *                     | *                                           |                       | 7     |
| Jiang, 2020      | *                                        | *                                   | *                         | *                                            |                          | *                     | *                                           |                       | 6     |
| Lai, 2019        | *                                        | *                                   | *                         | *                                            | *                        | *                     | *                                           |                       | 7     |
| Lecamwasam, 2021 | *                                        | *                                   | *                         | *                                            | **                       | *                     | *                                           |                       | 8     |
| Li, 2019         | *                                        | *                                   | *                         | *                                            | **                       | *                     | *                                           |                       | 8     |
| Lin, 2021        | *                                        | *                                   | *                         | *                                            | *                        | *                     | *                                           |                       | 7     |
| Liu, 2022        | *                                        | *                                   | *                         | *                                            | *                        | *                     | *                                           |                       | 7     |
| Luo, 2021        | *                                        | *                                   | *                         | *                                            | **                       | *                     | *                                           |                       | 8     |
| Miao, 2018       | *                                        | *                                   | *                         | *                                            |                          | *                     | *                                           |                       | 6     |
| Nazzal, 2017     | *                                        | *                                   | *                         | *                                            | *                        | *                     | *                                           |                       | 7     |
| Pivari, 2022     | *                                        | *                                   | *                         | *                                            | **                       | *                     | *                                           |                       | 8     |
| Ren, 2020        | *                                        | *                                   | *                         | *                                            | *                        | *                     | *                                           |                       | 7     |
| Wang, 2019       | *                                        | *                                   | *                         | *                                            | *                        | *                     | *                                           |                       | 7     |
| Yacoub, 2017     | *                                        | *                                   | *                         | *                                            | *                        | *                     | *                                           |                       | 7     |
| Zheng, 2020      | *                                        | *                                   | *                         | *                                            | *                        | *                     | *                                           |                       | 7     |

Good quality: 3 or 4 stars in selection domain AND 1 or 2 stars in comparability domain AND 2 or 3 stars in outcome/exposure domain. Fair quality: 2 stars in selection domain AND 1 or 2 stars in comparability domain AND 2 or 3 stars in outcome/exposure domain. Poor quality: 0 or 1 star in selection domain OR 0 stars in comparability domain OR 0 or 1 stars in outcome/exposure domain.
